# Supplementary material
Source: Springer Nature journal article supplement (https://www.springermedizin.de/resource/supplementary/12889_2010_2131_MOESM1_ESM.pdf/9484664)
Supplement: MOESM1 [file 9484664]

**Enrolment**

Parents of 2-4 year-old children  
assessed for eligibility (n=\_)

Excluded (n=\_)  
Not meeting inclusion criteria  
(n=\_)  
Declined to participate (n=\_)  
Other reasons (n=)

Randomised (n=\_ parent-child  
dyads)

**Allocation**

Allocated to intervention group  
(n=\_)  
Received allocated intervention  
(n=\_)  
Did not receive allocated  
intervention; give reasons (n=\_)

Allocated to wait-list control group  
(n=\_)

**Follow-Up**

Follow-up  
Returned questionnaire at \_\_\_  
scheduled time point (n=\_)  
Lost to follow up; give reasons  
(n=\_)  
Discontinued intervention; give  
reasons (n=\_)

Follow-up  
Returned questionnaire at \_\_\_  
scheduled time point (n=\_)  
Lost to follow up; give reasons  
(n=\_)  
Discontinued control; give  
reasons (n=\_)

**Analysis**

Analysed (n=\_)  
Excluded from analysis; give  
reasons (n=\_)

Analysed (n=\_)  
Excluded from analysis; give  
reasons (n=\_)
